# Supplementary material for: An Ag-nanoplate decorated cavity-nanorod array SERS substrate for trace detection of PCB-77
Source: Royal Society of Chemistry journal article supplement (doi:10.1039/d5ay00025d), 2025-01-01
Supplement: d5ay00025d1.pdf [file d5ay00025d1.pdf]

## Ag-nanoplates decorated cavity-nanorod array SERS substrate for trace detection of PCB-77

Jinran Chen<sup>abc</sup>, Xiurui Ke<sup>ac</sup>, Zhou Zhou<sup>d</sup>, Wen-Qi Ye<sup>\*ac</sup>,  
Hong Liu<sup>ac</sup>, Wei Zhang<sup>ac</sup>, Xiaohong Liu<sup>\*e</sup>

- a. Chongqing Institute of Green and Intelligent Technology, Chinese Academy of Sciences, Chongqing 400714, P. R. China
- b. Chongqing Jiaotong University, Chongqing, 400074, P. R. China
- c. Chongqing school, University of Chinese Academy of Sciences (UCAS Chongqing), Chongqing 400714, P. R. China
- d. The University of Manchester, Department of Materials, Oxford Road, Manchester M13 9PL UK
- e. National University of Singapore (Chongqing) Research Institute, Chongqing, 401123, P. R. China

\* Corresponding Author: Wen-Qi Ye, E-mail: [yewenqi@cigit.ac.cn](mailto:yewenqi@cigit.ac.cn); Xiaohong Liu, E-mail: [xiaohong.liu@nusricq.cn](mailto:xiaohong.liu@nusricq.cn)

Table S1 Orthogonal test of MACE

| Sequence | Factor | Concentration of AgNO <sub>3</sub><br>(mol • L <sup>-1</sup> ) | Deposition Time<br>(min) | Etching Time<br>(min) |
|----------|--------|----------------------------------------------------------------|--------------------------|-----------------------|
| 1        |        | 5.0×10 <sup>-3</sup>                                           | 2                        | 3                     |
| 2        |        | 5.0×10 <sup>-3</sup>                                           | 3                        | 4                     |
| 3        |        | 5.0×10 <sup>-3</sup>                                           | 4                        | 5                     |
| 4        |        | 7.5×10 <sup>-3</sup>                                           | 2                        | 4                     |
| 5        |        | 7.5×10 <sup>-3</sup>                                           | 3                        | 5                     |
| 6        |        | 7.5×10 <sup>-3</sup>                                           | 4                        | 3                     |
| 7        |        | 10×10 <sup>-3</sup>                                            | 2                        | 5                     |
| 8        |        | 10×10 <sup>-3</sup>                                            | 3                        | 3                     |
| 9        |        | 10×10 <sup>-3</sup>                                            | 4                        | 4                     |

Table S2 Analyze orthogonal test

| Project          | Level | Concentration of AgNO <sub>3</sub><br>(mol·L <sup>-1</sup> ) | Deposition Time<br>(min) | Etching Time<br>(min) |
|------------------|-------|--------------------------------------------------------------|--------------------------|-----------------------|
| K                | 1     | 24951.06                                                     | -                        | -                     |
|                  | 2     | 14175.97                                                     | -                        | 13789.19              |
|                  | 3     | 15619.81                                                     | 19333.31                 | 22576.27              |
|                  | 4     | -                                                            | 18135.31                 | 18381.37              |
|                  | 5     | -                                                            | 17278.22                 | -                     |
| K <sub>avg</sub> | 1     | 8317.02                                                      | -                        | -                     |
|                  | 2     | 4725.32                                                      | -                        | 4596.4                |
|                  | 3     | 5206.6                                                       | 6444.44                  | 7525.42               |
|                  | 4     | -                                                            | 6045.1                   | 6127.12               |
|                  | 5     | -                                                            | 5759.41                  | -                     |
| The best level   |       | 1                                                            | 3                        | 3                     |
| R                |       | 3591.7                                                       | 685.03                   | 2929.03               |
| Quantity         |       | 3                                                            | 3                        | 3                     |
| Repeats          |       | 3                                                            | 3                        | 3                     |

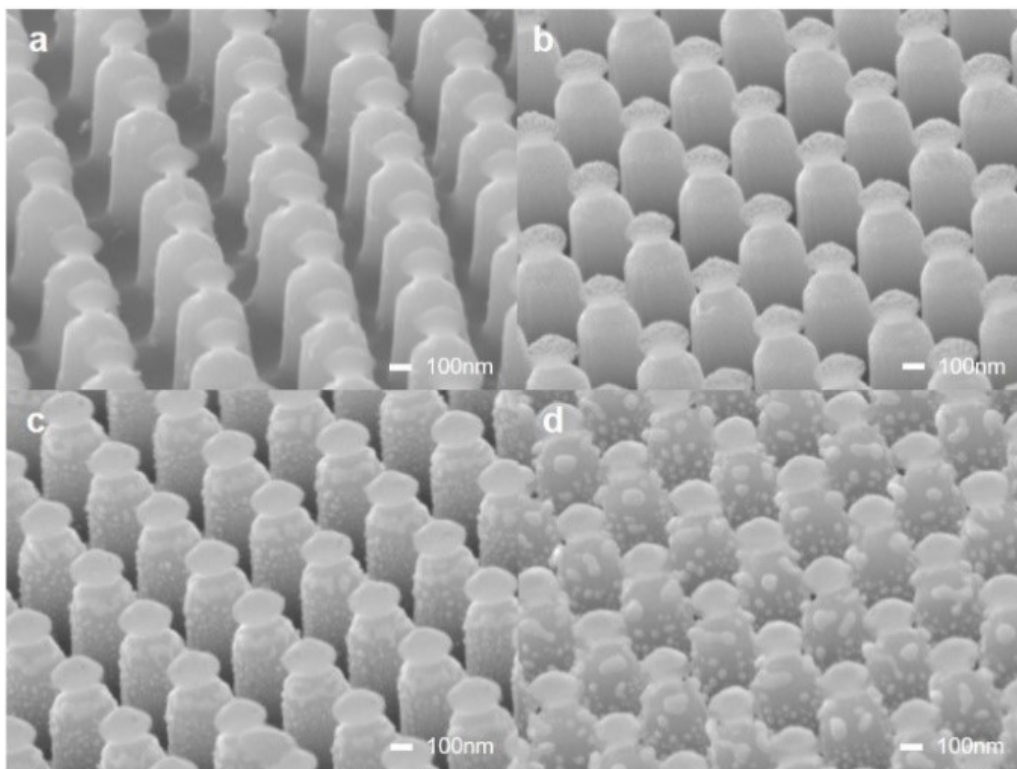

Figure S1 SEM images of sputtering (a) 0 nm, (b) 5 nm, (c) 10 nm, (d) 15nm Au on nanorod substrate.

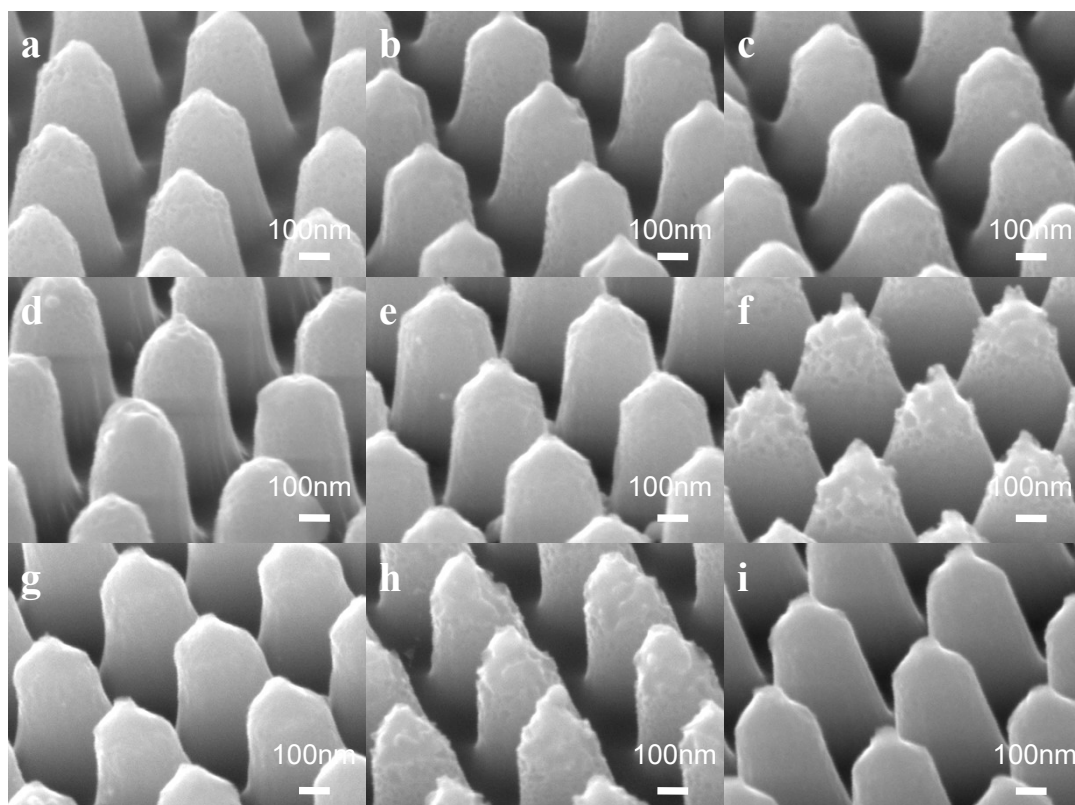

Figure S2 SEM images of substrate (a)~(i) No.1~9 in orthogonal test.

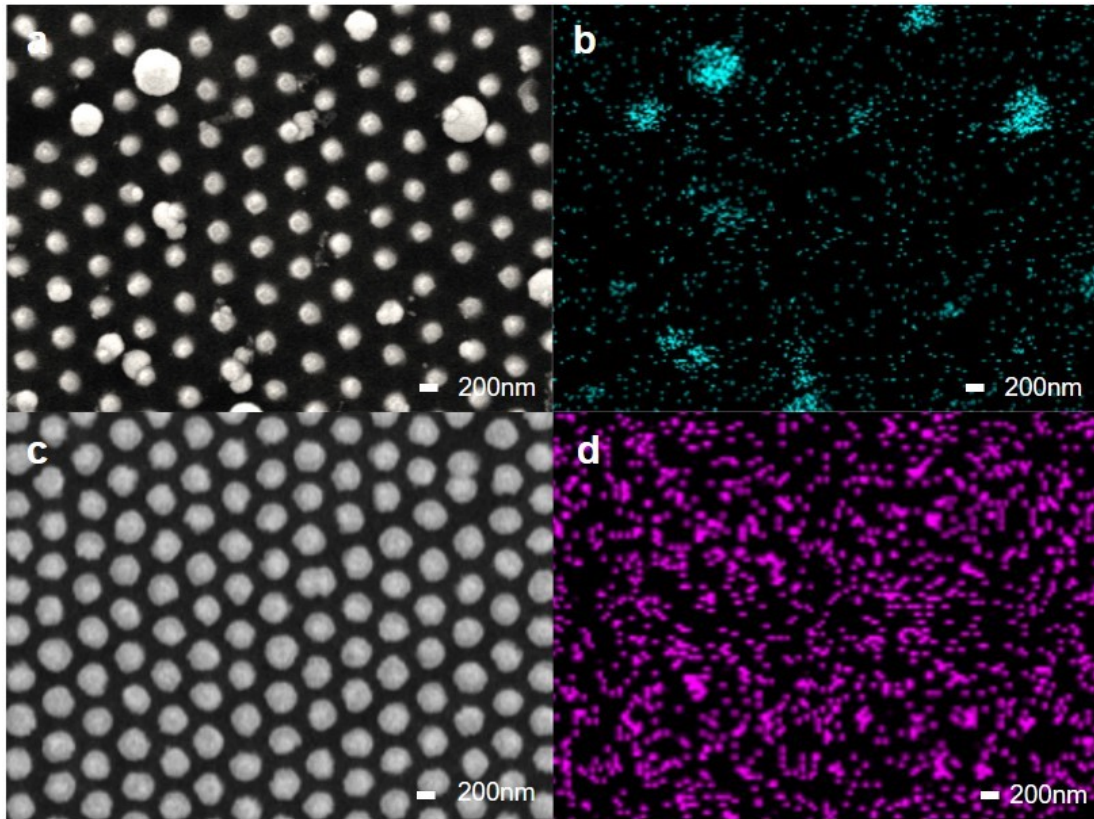

Figure S3 The substrate without gold seeds was deposited in galvanic cell at 10min: (a) SEM image, (b) Ag in EDS mapping; the substrate with gold seeds was deposited in galvanic cell at 10min: (c) SEM image, (d) Ag in EDS mapping.

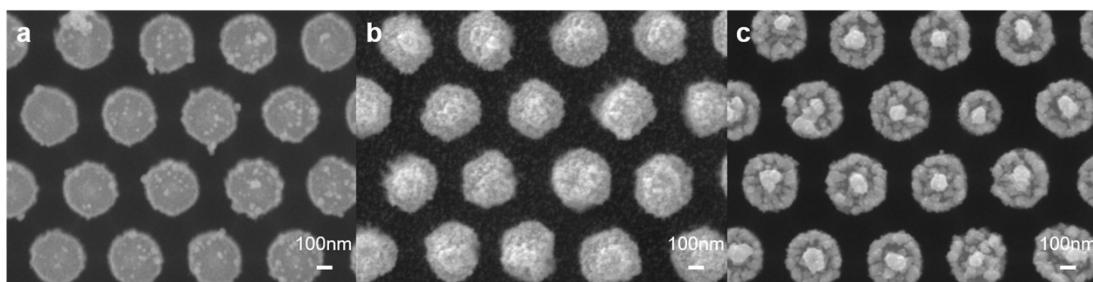

Figure S4 SEM images of No.8 substrates deposit in galvanic cells for (a) 5 min, (b) 10 min, and (c) 15 min.

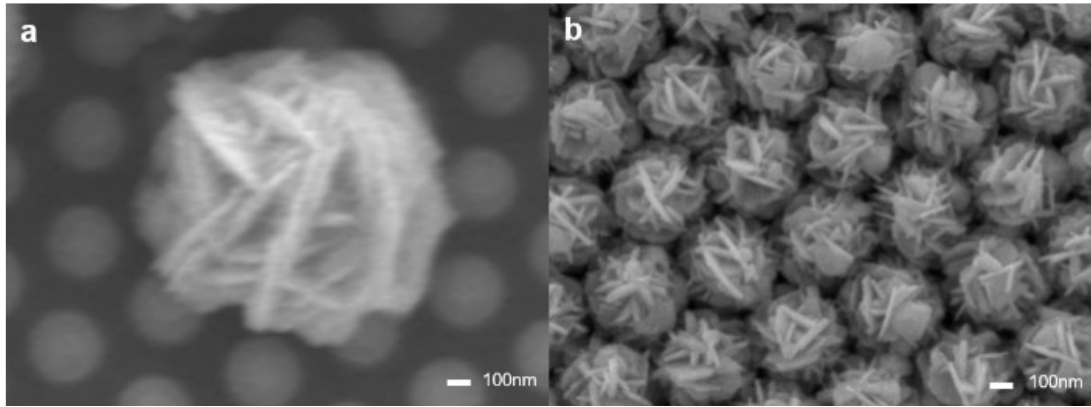

Figure S5 The gold-sputtered substrate and the nongold-sputtered substrate galvanic cells were deposited for 20min.

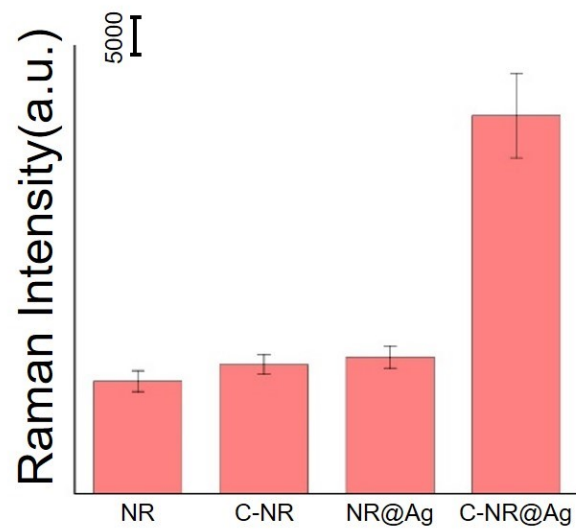

Figure S6 The performance of different substrates using the characteristic peak intensity of  $611\text{ cm}^{-1}$  based on the Raman spectra. The error bar was calculated by three replicated determinations.



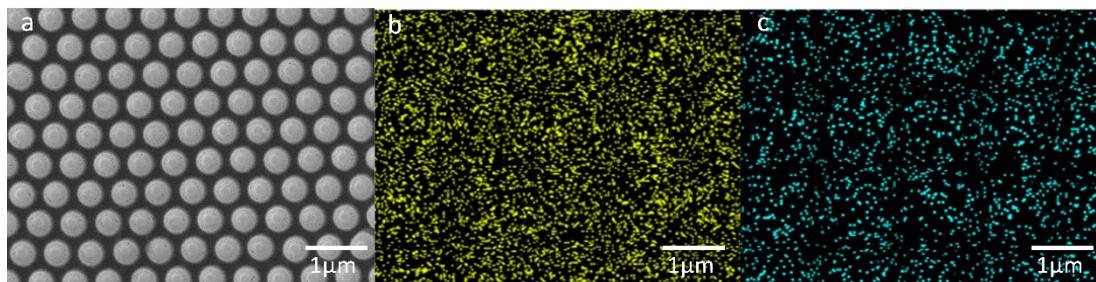

Figure S7 (a) SEM image of C-NR@Ag substrate. (b) EDS mapping results of Au on C-NR@Ag substrate based on a. (c) EDS mapping results of Ag on C-NR@Ag substrate based on a.

Table S3 EDS content analysis of various elements on the surface

| element | Normalized quality (%) | Atom (%) |
|---------|------------------------|----------|
| C       | 6.76                   | 16.90    |
| O       | 1.04                   | 1.94     |
| Si      | 71.94                  | 76.88    |
| Ag      | 9.44                   | 2.63     |
| Au      | 10.82                  | 1.65     |
| Total   | 100.00                 | 100.00   |

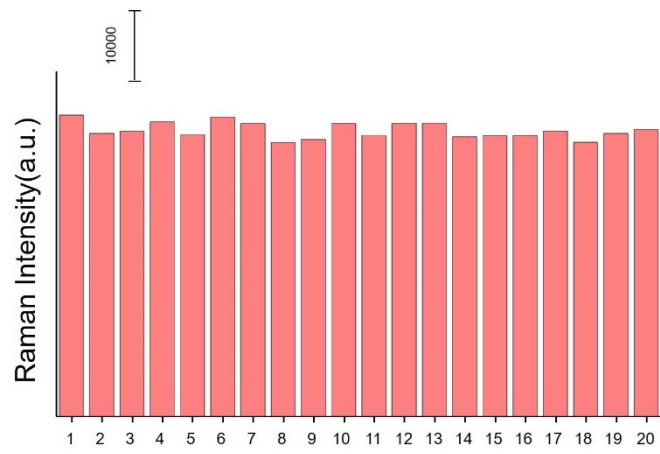

Figure S8 20 points of the peak intensity of  $1078\text{ cm}^{-1}$ .

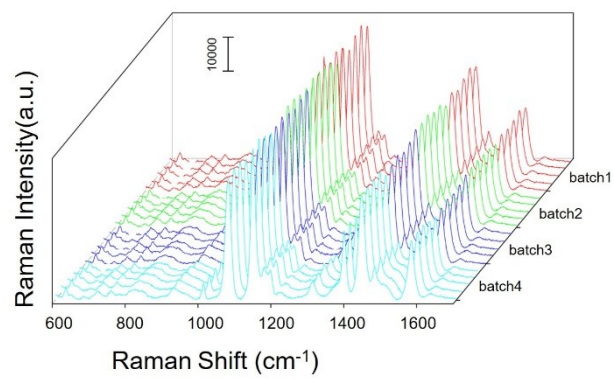

Figure S9 The Raman spectra of the substrate with four batches using  $10^{-5}$  M p-ATP.

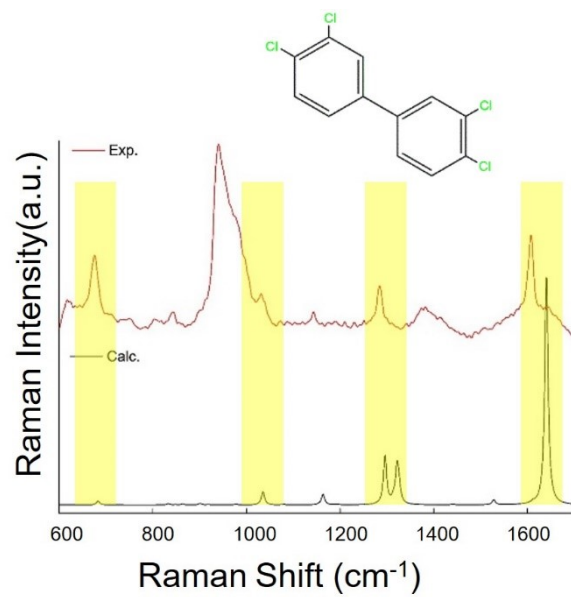

Figure S10 The Raman peak positions of the PCB-77 molecules from theoretical simulation from 650  $\text{cm}^{-1}$  to 1650  $\text{cm}^{-1}$ .

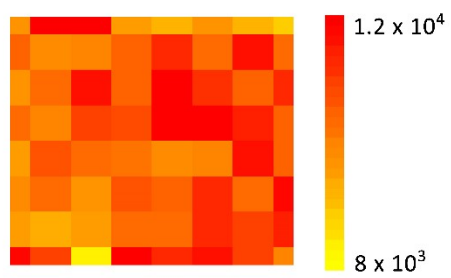

Figure S11 The uniformity of the substrate using the characteristic peak intensity of 1608 cm<sup>-1</sup>.
